# Supplementary material
Source: ML conference proceedings conference paper supplement (https://proceedings.neurips.cc/paper_files/paper/2025/hash/c3aa90d5d91f3e3a924036e93232fe14-Abstract.html)

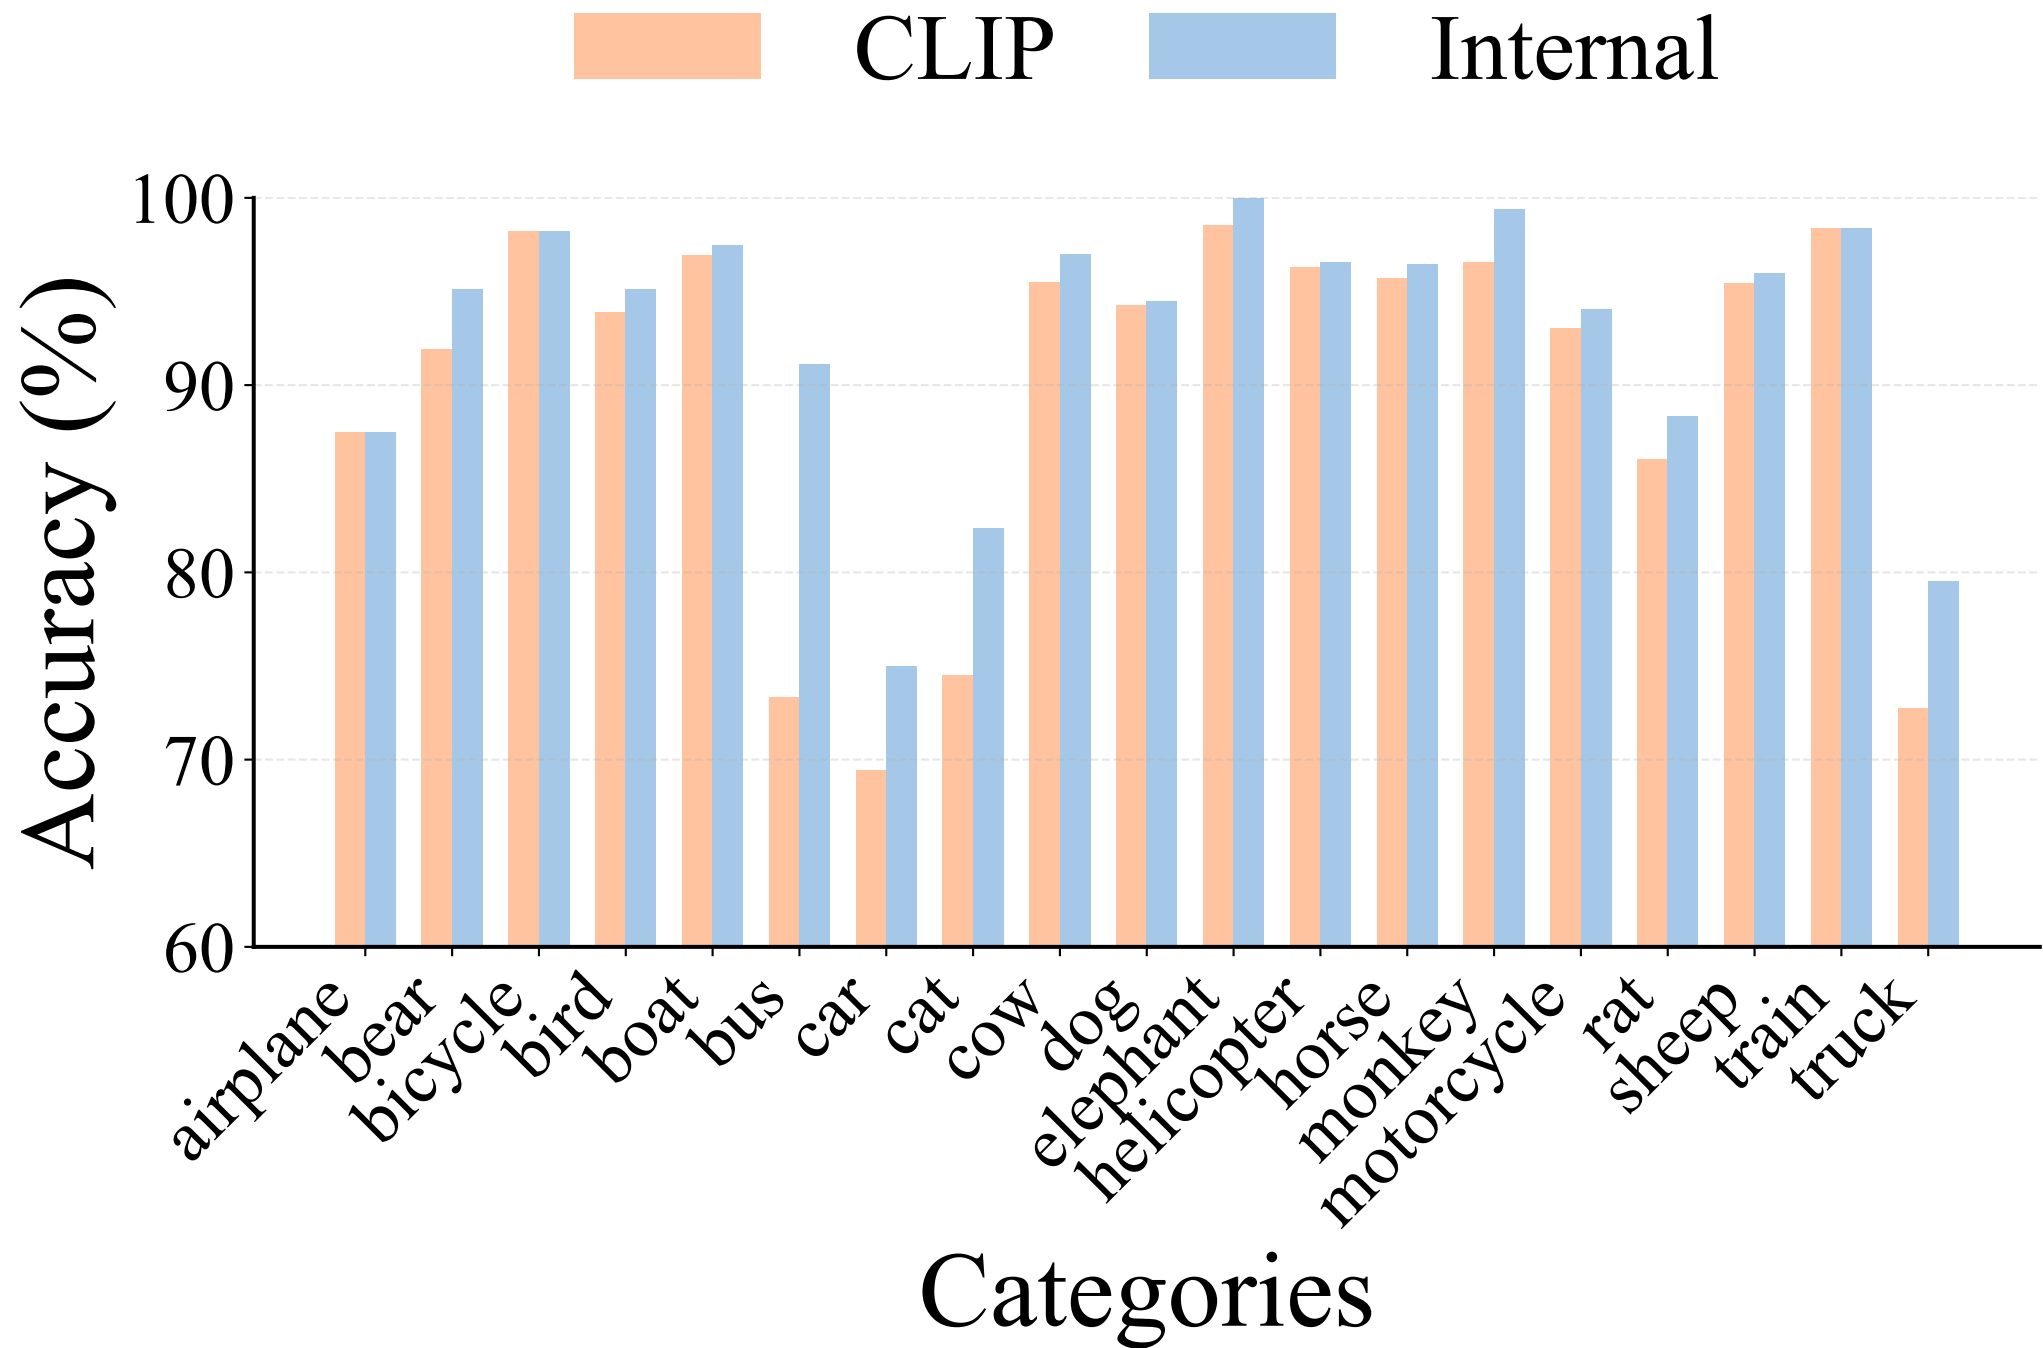

Supplement: Supplementary file 1 [file nico_compare_worst_bar(inner_cz).pdf › Supplementary material/picture/nico_compare_worst_bar(inner_cz).pdf]

Accuracy (%)

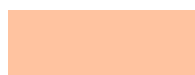

CLIP

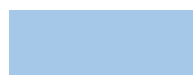

External

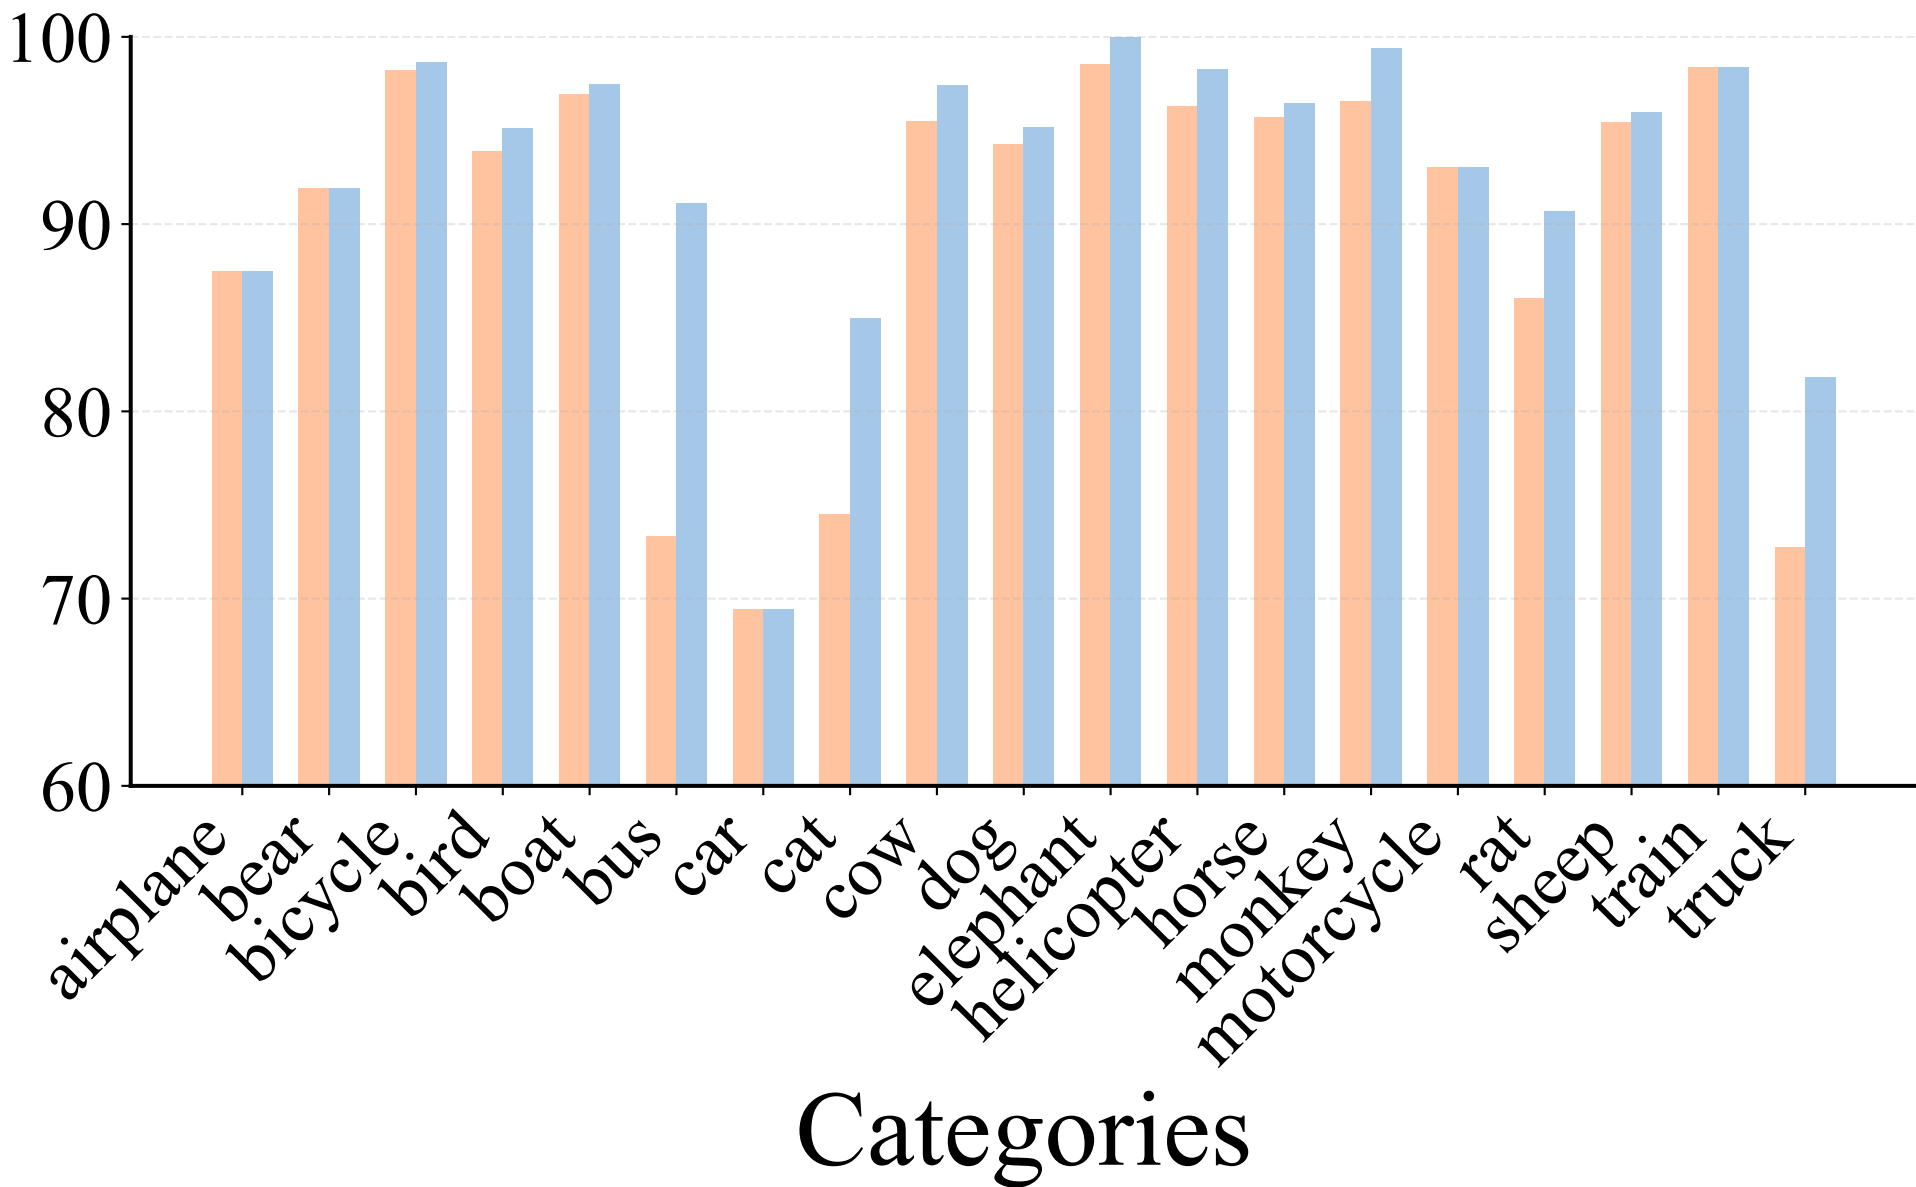

Supplement: Supplementary file 2 [file nico_compare_worst_bar(outer_cz).pdf › Supplementary material/picture/nico_compare_worst_bar(outer_cz).pdf]

Accuracy (%)

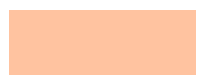

CLIP

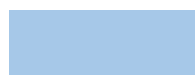

Virtual

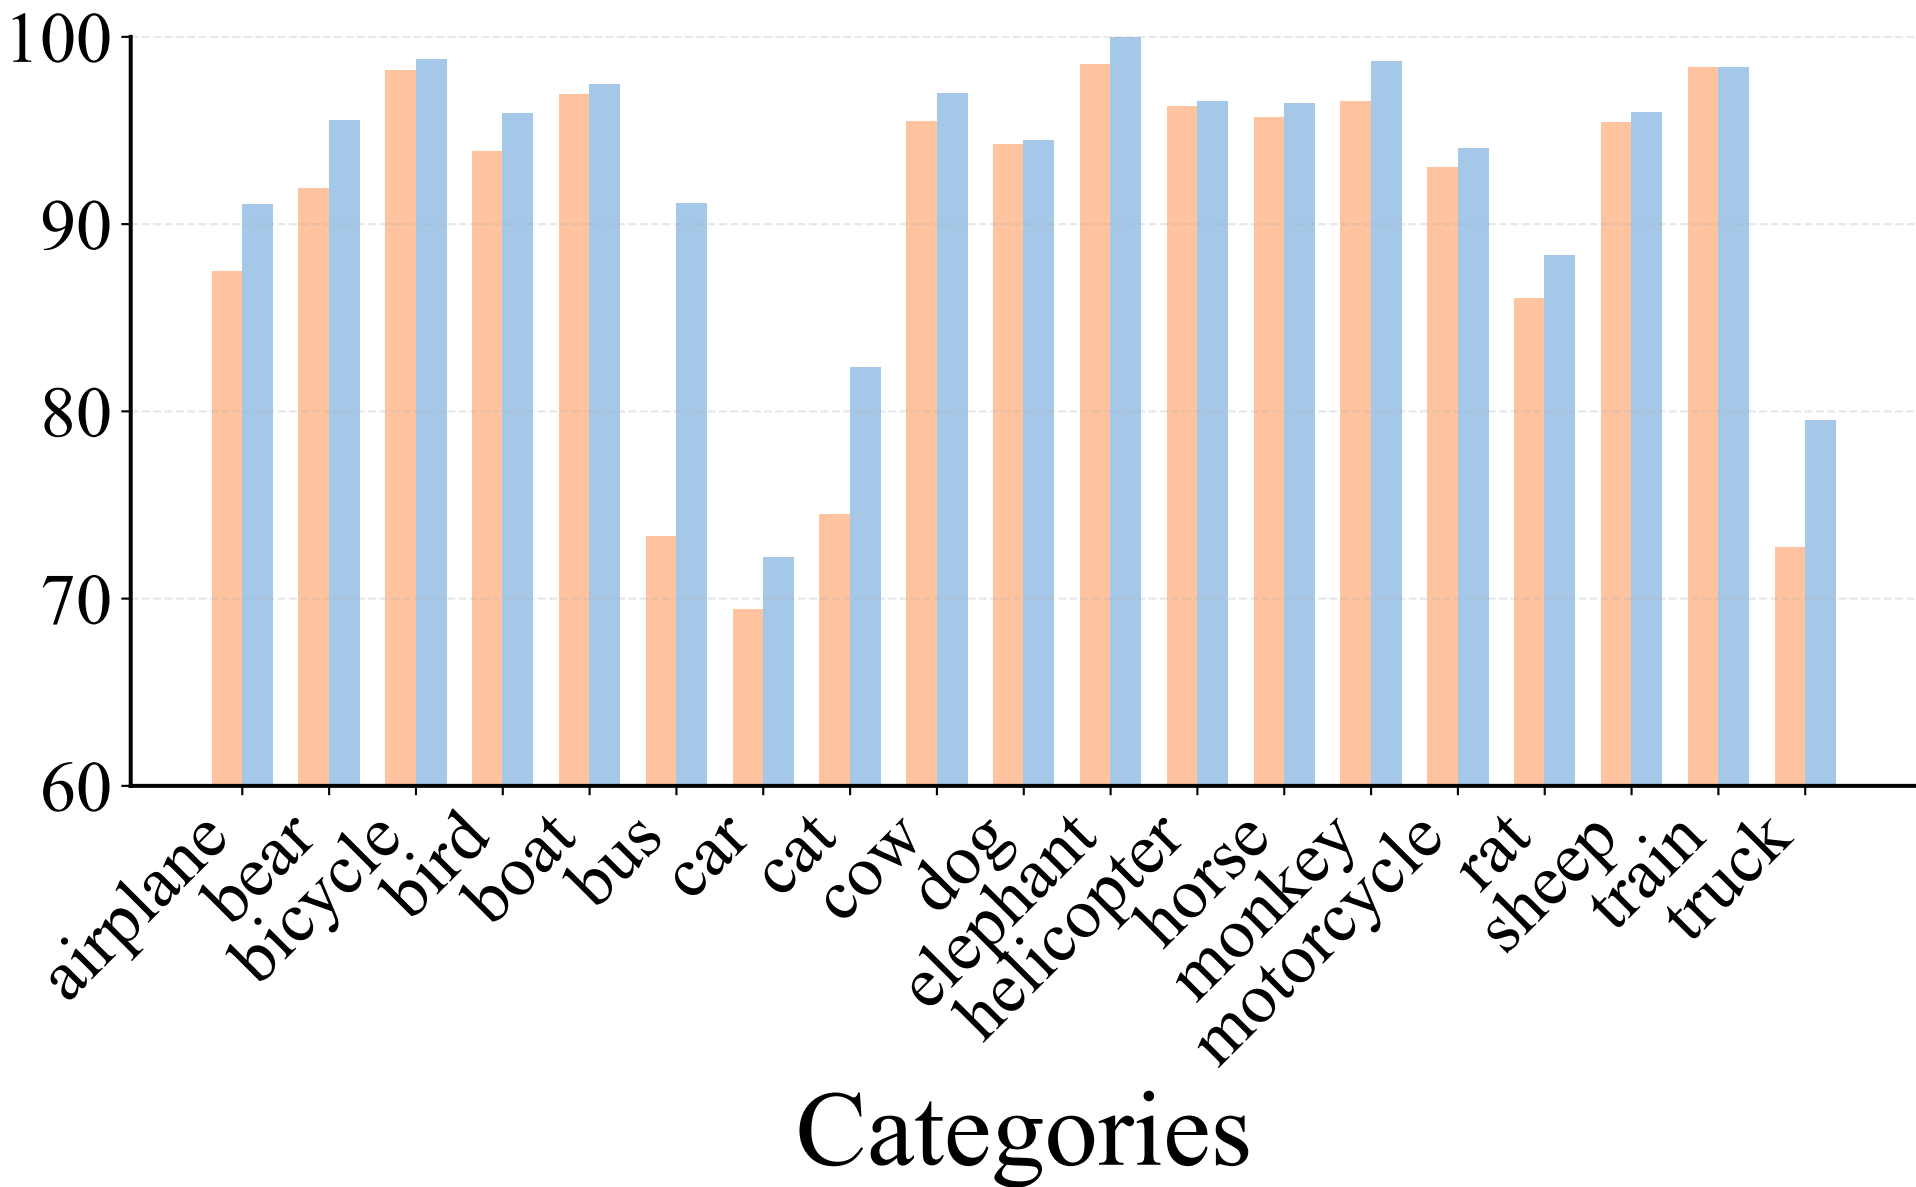

Supplement: Supplementary file 3 [file nico_compare_worst_bar(virtual_cz).pdf › Supplementary material/picture/nico_compare_worst_bar(virtual_cz).pdf]

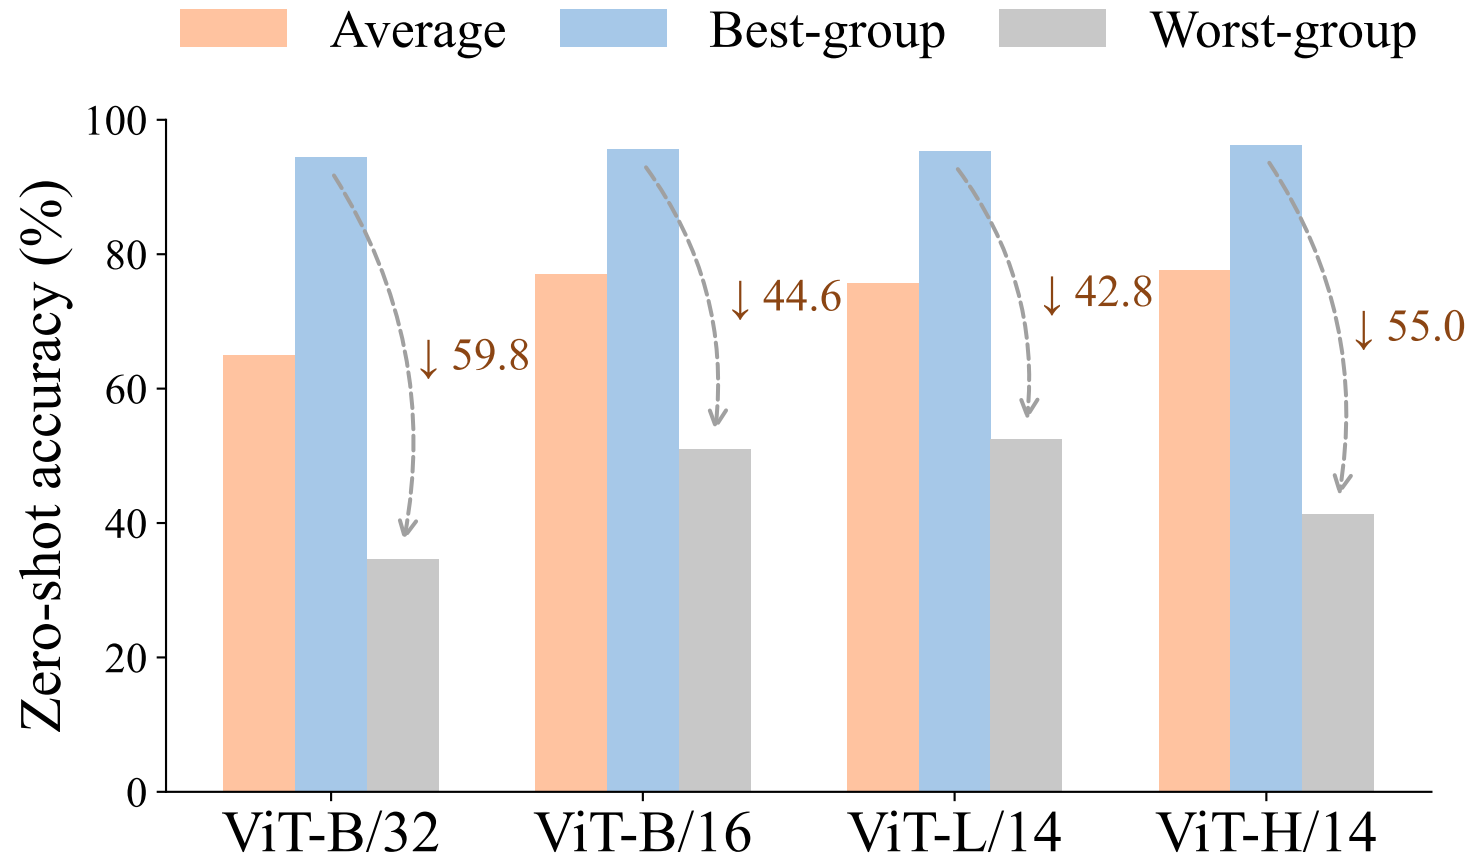

Supplement: Supplementary file 4 [file vit_comparison.pdf › Supplementary material/picture/vit_comparison.pdf]
